# Supplementary material for: Structural reconstruction of BiPbO2Br nanosheets for electrochemical CO2reduction to formate
Source: Royal Society of Chemistry journal article supplement (doi:10.1039/d3qm00262d), 2023-01-01
Supplement: d3qm00262d1.pdf [file d3qm00262d1.pdf]

## Supporting Information

### Structural reconstruction of BiPbO<sub>2</sub>Br nanosheets for electrochemical CO<sub>2</sub> reduction to formate

Gaoming Sun,<sup>‡ab</sup> Chong Zou,<sup>‡c</sup> Wen Sun,<sup>ab</sup> Ying Fang,<sup>ab</sup> Shujian He,<sup>d</sup> Yana Liu,<sup>ab</sup>  
Jiguang Zhang,<sup>ab</sup> Yunfeng Zhu<sup>\*ab</sup> and Jun Wang<sup>\*ab</sup>

<sup>a</sup>College of Materials Science and Engineering, Nanjing Tech University, 30 South  
Puzhu Road, Nanjing 211816, China.

E-mail: jun22@njtech.edu.cn; yfzhu@njtech.edu.cn

<sup>b</sup>Jiangsu Collaborative Innovation Centre for Advanced Inorganic Function Composites,  
Nanjing Tech University, Nanjing 211816, China.

<sup>c</sup>School of Chemistry and Molecular Engineering, Nanjing Tech University, Nanjing  
211816, China.

<sup>d</sup>Co-Innovation Centre of Efficient Processing and Utilization of Forest Resources,  
College of Materials Science and Engineering, Nanjing Forestry University, Nanjing  
210037, China.

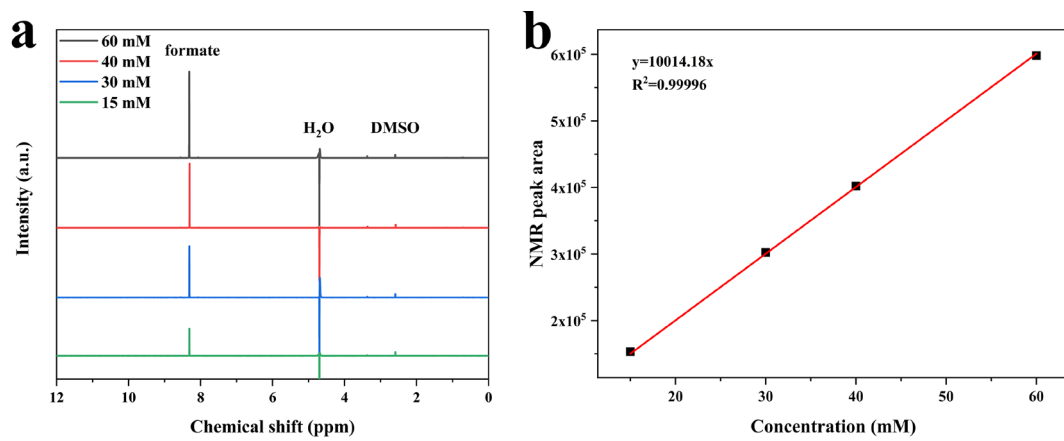

**Fig. S1.** (a) <sup>1</sup>H NMR spectra of formate with different concentration. (b) The corresponding calibration curve.

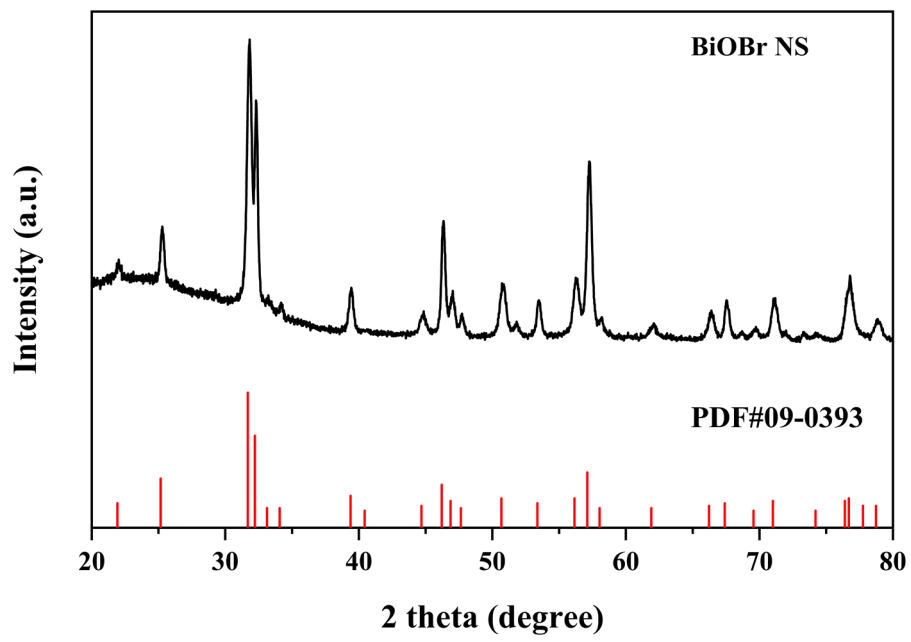

Fig. S2. XRD pattern of BiOBr NS.

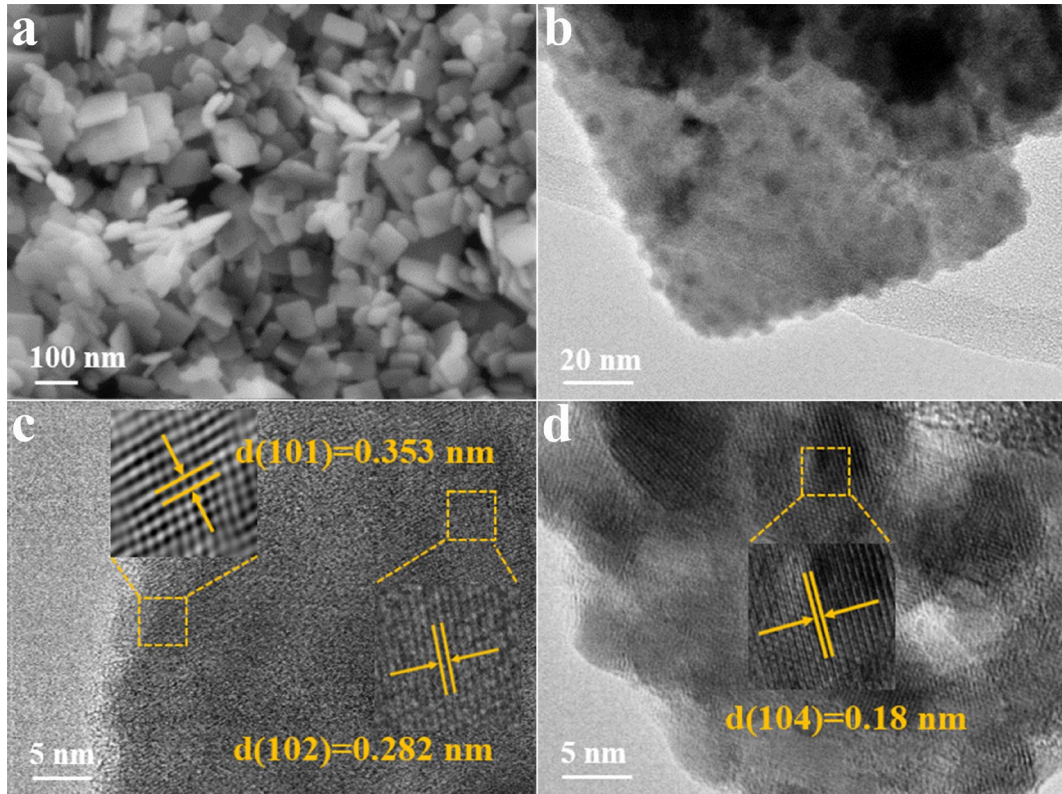

**Fig. S3.** (a) SEM, (b) TEM and (c-d) HRTEM images of BiOBr NS.

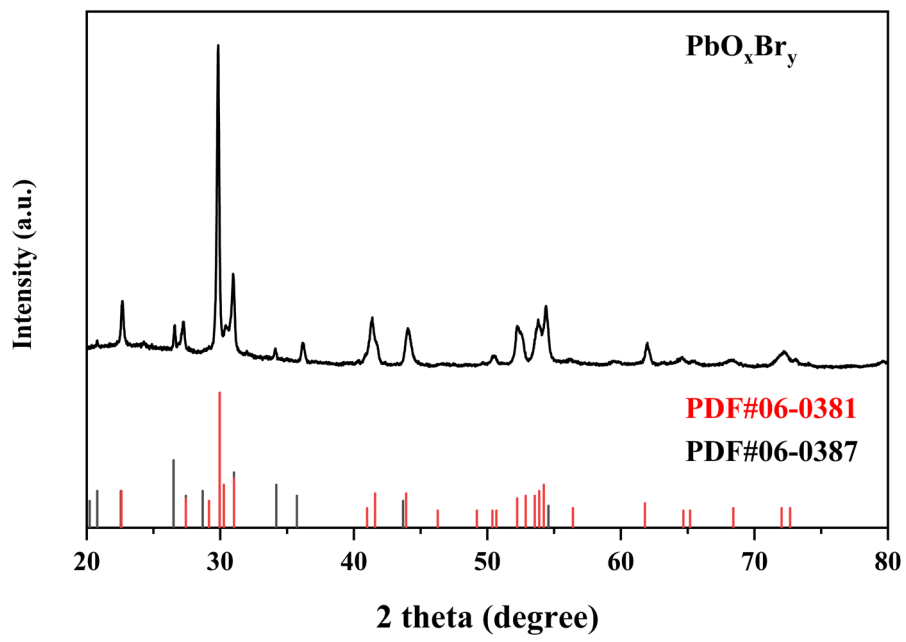

Fig. S4. XRD pattern of  $\text{PbO}_x\text{Br}_y$ .

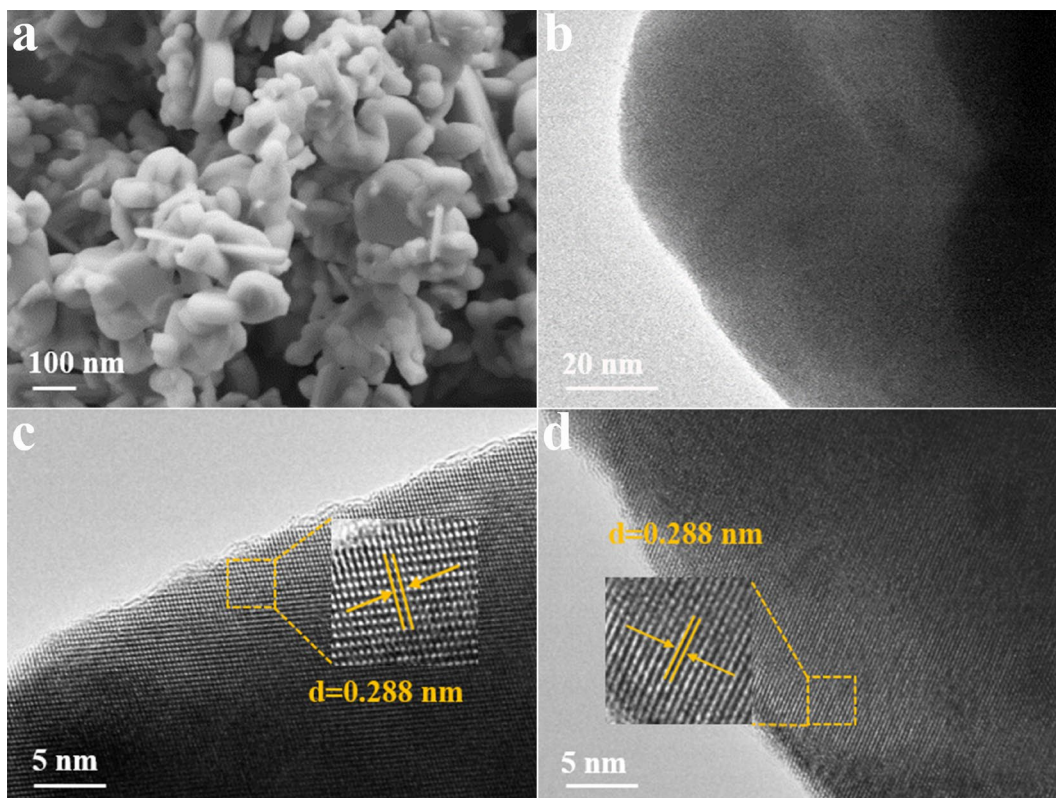

**Fig. S5.** (a) SEM, (b) TEM and (c-d) HRTEM images of  $\text{PbO}_x\text{Br}_y$ .

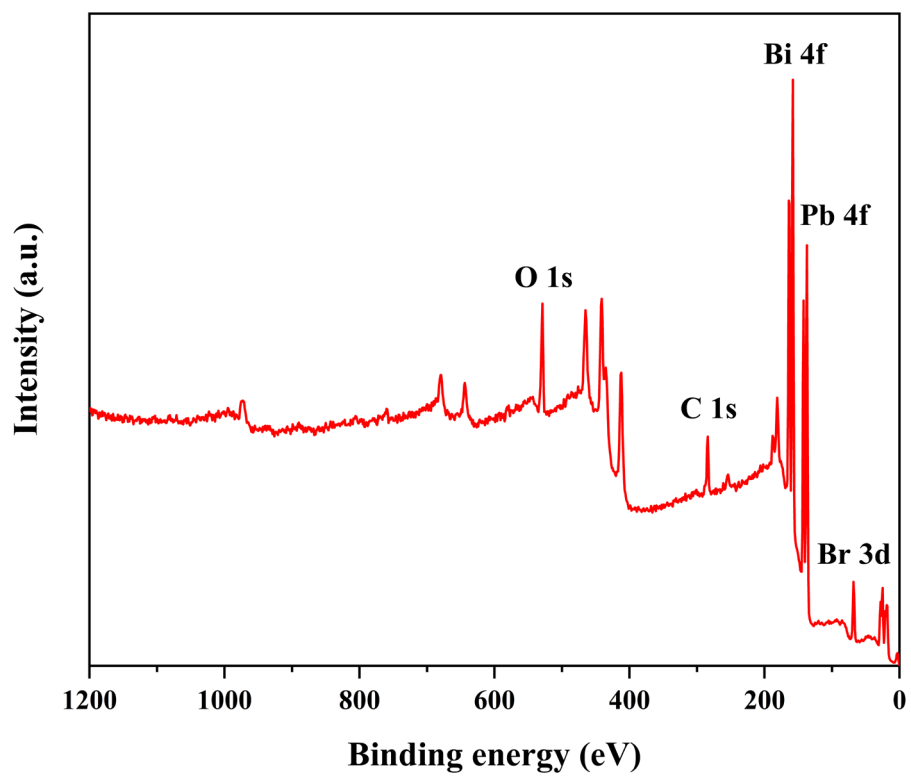

**Fig. S6.** XPS survey spectrum of BiPbO<sub>2</sub>Br.

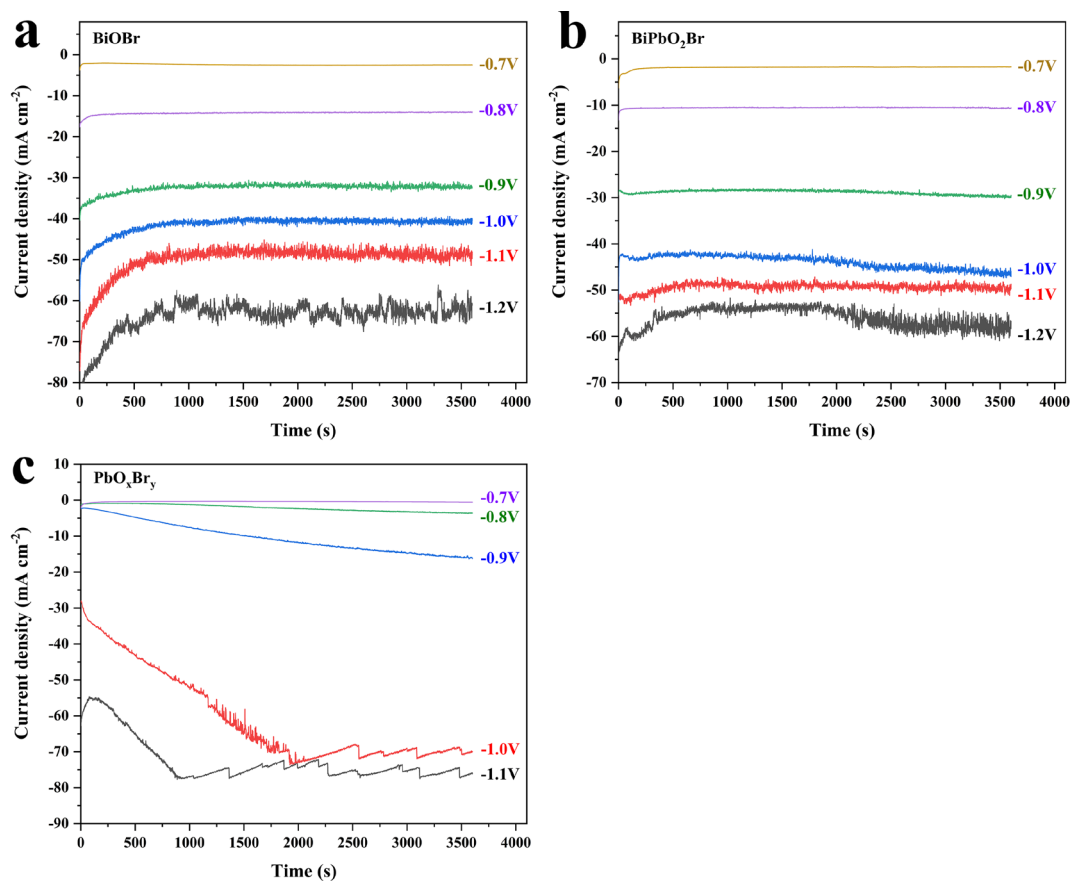

**Fig. S7.** The controlled electrolysis at different potentials over (a) BiOBr, (b) BiPbO<sub>2</sub>Br and (c) PbO<sub>x</sub>Br<sub>y</sub> in CO<sub>2</sub>-saturated 0.5 M NaHCO<sub>3</sub>.



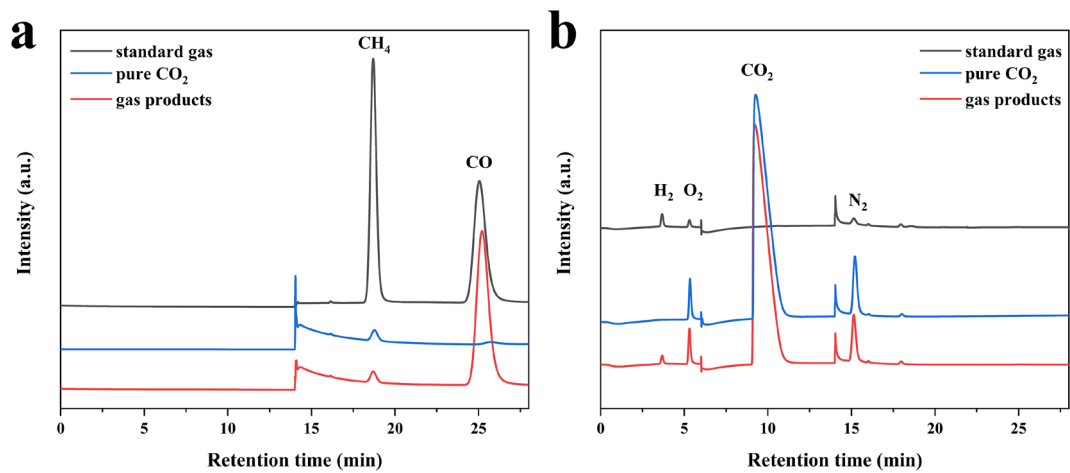

**Fig. S8.** GC FID (a) and TCD (b) spectra for determining CO and H<sub>2</sub> in gaseous products over BiPbO<sub>2</sub>Br at -0.9 V. Notably, the standard gas and pure CO<sub>2</sub> were also measured for comparison.

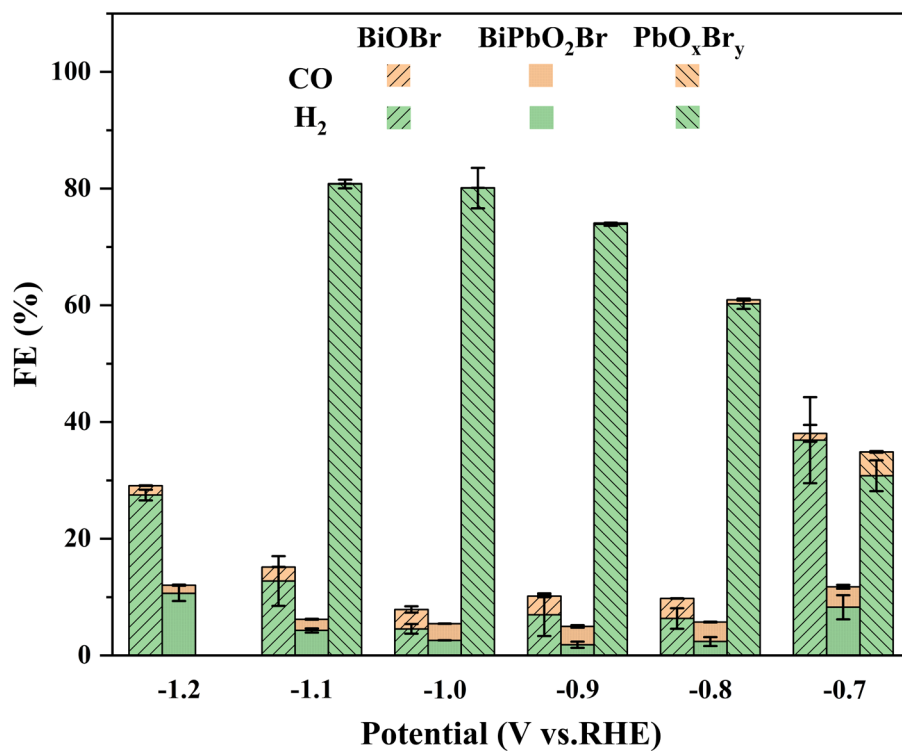

Fig. S9. Faradaic efficiency of CO and H<sub>2</sub> over BiOBr, BiPbO<sub>2</sub>Br and PbO<sub>x</sub>Br<sub>y</sub> at different potentials.

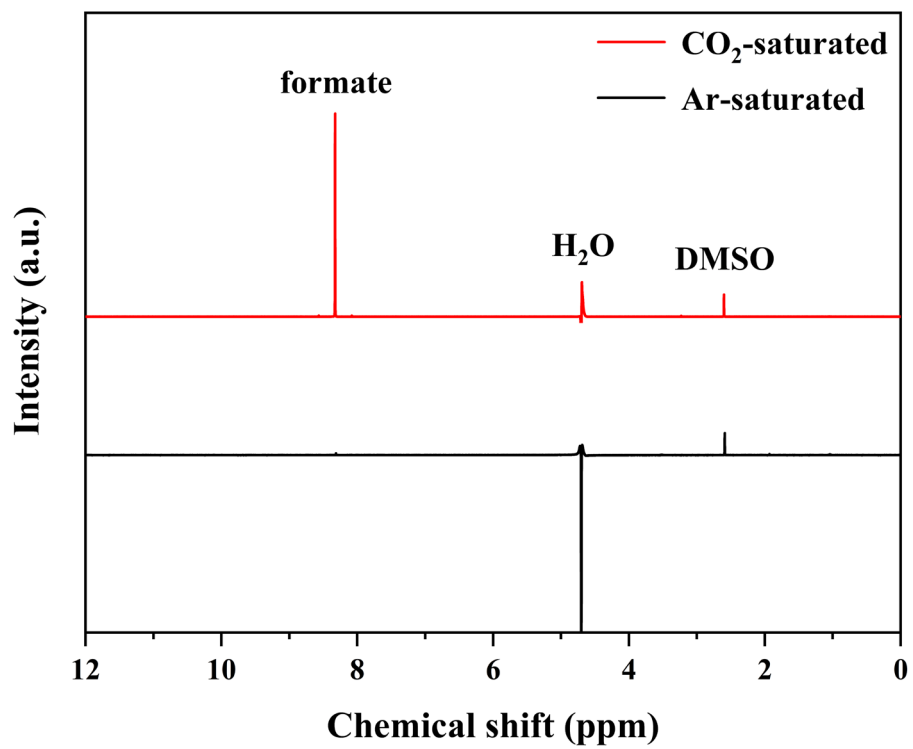

**Fig. S10.**  $^1\text{H}$  NMR spectra of  $\text{CO}_2$  or Ar-saturated 0.5 M  $\text{NaHCO}_3$  solution after 1 h electrolysis over  $\text{BiPbO}_2\text{Br}$ .

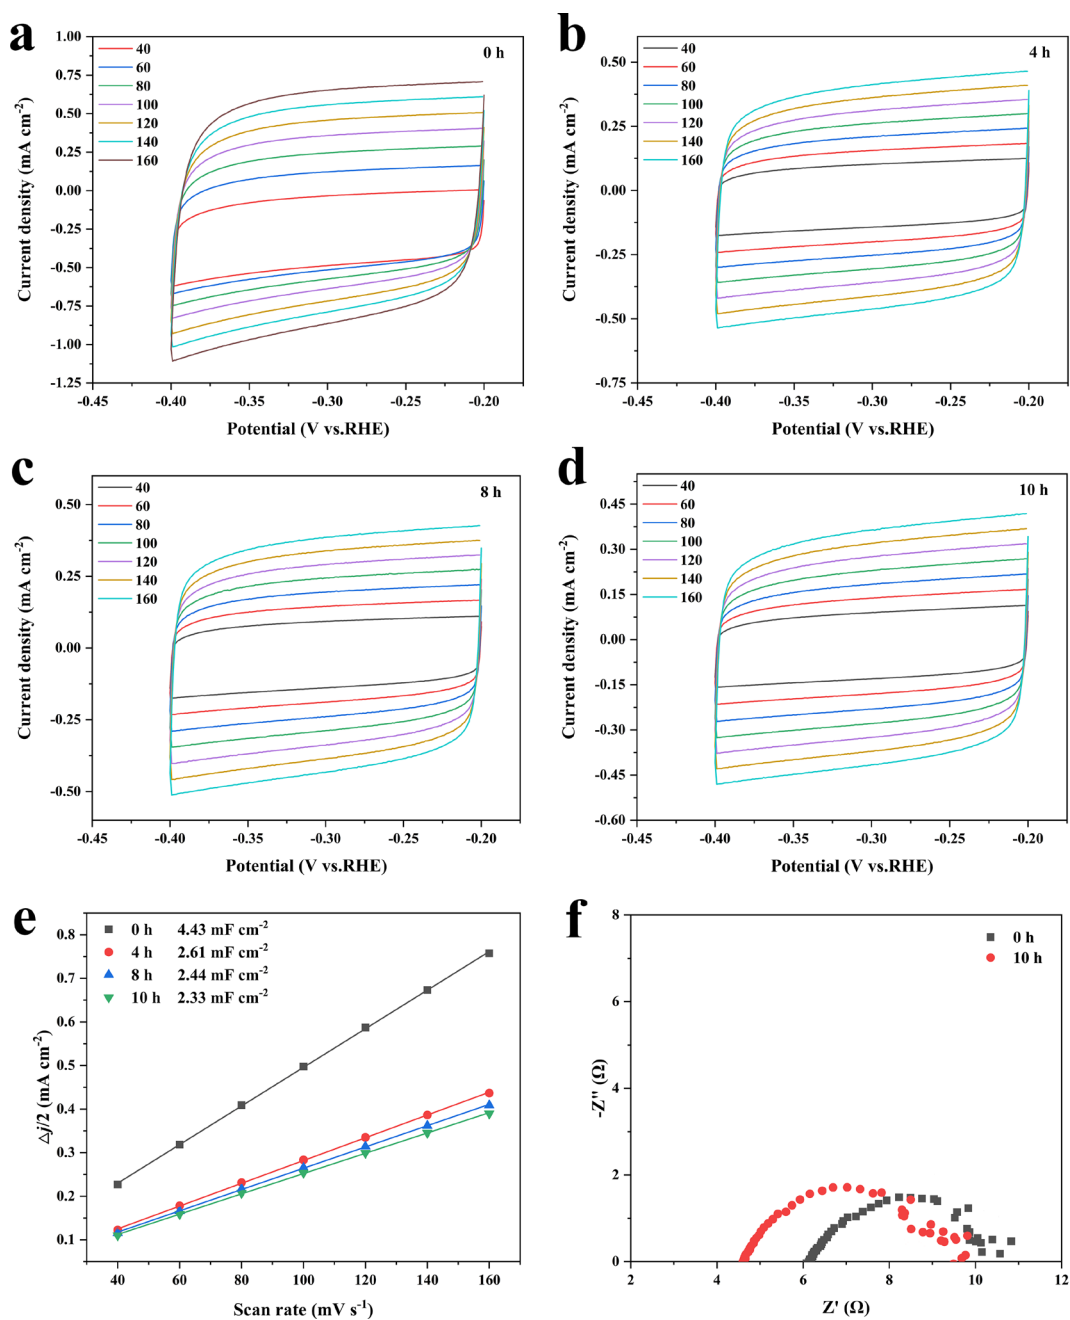

**Fig. S11.** (a-d) CV curves at different scan rates for BiPbO<sub>2</sub>Br with varied electrolysis time, (e) the according charging current density plotted against scan rates, and (f) EIS spectra of BiPbO<sub>2</sub>Br before and after the long-term chronoamperometric test.

It is found that the  $C_{dl}$  of BiPbO<sub>2</sub>Br electrode is gradually decreased with the preceding of chronoamperometric test, implying the decrease of ECSA. However, the EIS spectra reveal that the contact resistance of the electrode is obviously reduced, suggesting the increased conductivity after the test, which should be contributed to the increased current density during the chronoamperometric test.

**Table S1.** Comparison of CO<sub>2</sub>RR-to-formate performance of recently reported Bi or Pb-based electrocatalysts in H-type cell.

| Catalyst                                                                 | Electrolyte              | FE<br>(formate, %) | E<br>(V vs.RHE) | <i>j</i> <sub>formate</sub><br>(mA cm <sup>-2</sup> ) | Ref.         |
|--------------------------------------------------------------------------|--------------------------|--------------------|-----------------|-------------------------------------------------------|--------------|
| BiPbO <sub>2</sub> Br                                                    | 0.5 M NaHCO <sub>3</sub> | 96.6               | -0.9            | 26                                                    | This<br>work |
|                                                                          |                          | 93.1               | -1.0            | 40                                                    |              |
| Bi-OAm-300                                                               | 0.5 M KHCO <sub>3</sub>  | 97.1               | -0.9            | 31.1                                                  | 1            |
| SOR Bi@C NPs                                                             | 0.5 M KHCO <sub>3</sub>  | 95                 | -0.99           | 10.5                                                  | 2            |
| BiOCl                                                                    | 0.5 M KHCO <sub>3</sub>  | 92                 | -0.9            | 28.63                                                 | 3            |
| Pd-<br>Pb <sub>3</sub> (CO <sub>3</sub> ) <sub>2</sub> (OH) <sub>2</sub> | 0.1 M KHCO <sub>3</sub>  | 96.5               | -1.2            | 13                                                    | 4            |
| 3D Bi-ene-A/CM                                                           | 0.5 M KHCO <sub>3</sub>  | 96.02              | -0.88           | 21.21                                                 | 5            |
| Bi-Cu                                                                    | 0.5 M KHCO <sub>3</sub>  | 94.37              | -0.91           | 27.85                                                 | 6            |
| Bi-PNS                                                                   | 0.5 M KHCO <sub>3</sub>  | 95                 | -1.0            | 45                                                    | 7            |
| Bi/CB                                                                    | 0.5 M KHCO <sub>3</sub>  | 94                 | -0.9            | 16.7                                                  | 8            |
| Pits-Bi                                                                  | 0.1 M KHCO <sub>3</sub>  | 94.9               | -1.0            | 17.2                                                  | 9            |
| BiOCl-derived                                                            | 0.5 M KHCO <sub>3</sub>  | 92                 | -0.9            | 10.5                                                  | 10           |
| Bi/Bi <sub>2</sub> O <sub>3</sub> -CP                                    | 0.5 M KHCO <sub>3</sub>  | 90.3               | -0.87           | 32.4                                                  | 11           |
| BBNS                                                                     | 0.5 M NaHCO <sub>3</sub> | >92                | -0.89           | 11.5                                                  | 12           |
| Bi-Sn                                                                    | 0.1 M KHCO <sub>3</sub>  | 93.9               | -1.0            | 9.3                                                   | 13           |
| f-Bi <sub>2</sub> O <sub>3</sub>                                         | 0.1 M KHCO <sub>3</sub>  | 87                 | -1.2            | 20.9                                                  | 14           |
| BiPb                                                                     | 0.5 M NaHCO <sub>3</sub> | 91.86              | -0.96           | 15.56                                                 | 15           |

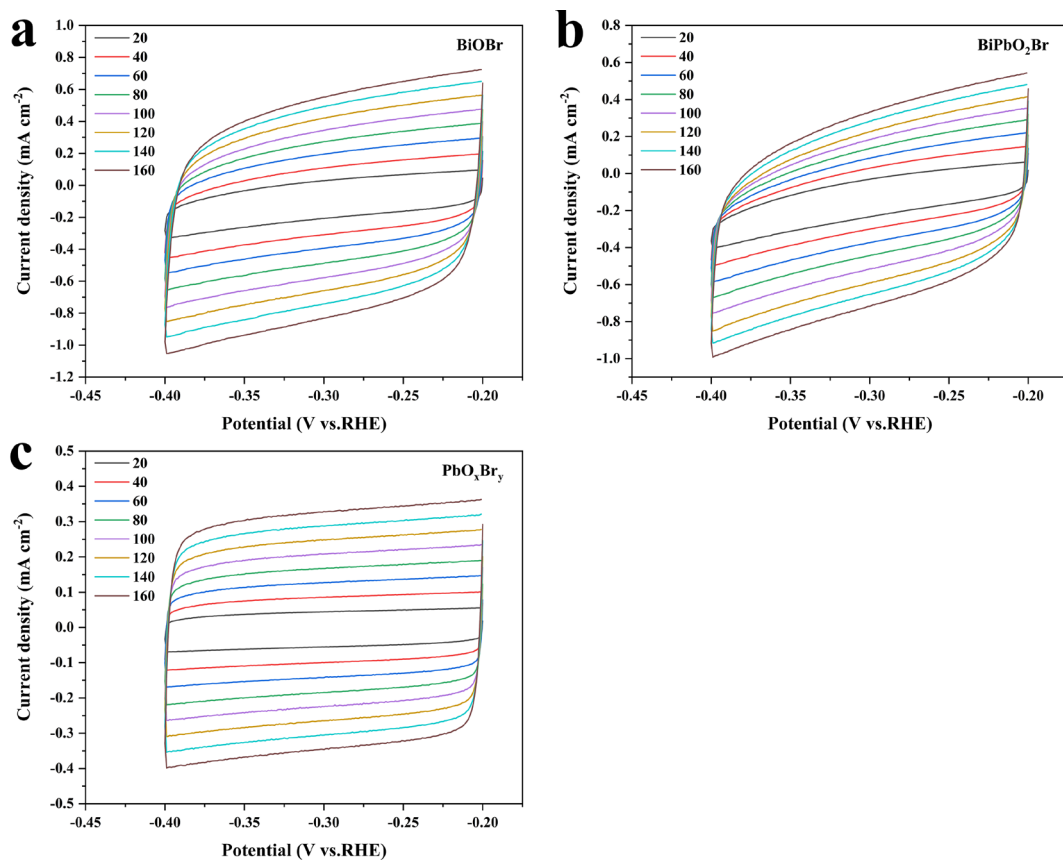

**Fig. S12.** CV curves of (a) BiOBr, (b) BiPbO<sub>2</sub>Br and (c) PbO<sub>x</sub>Br<sub>y</sub> with different scan rates.

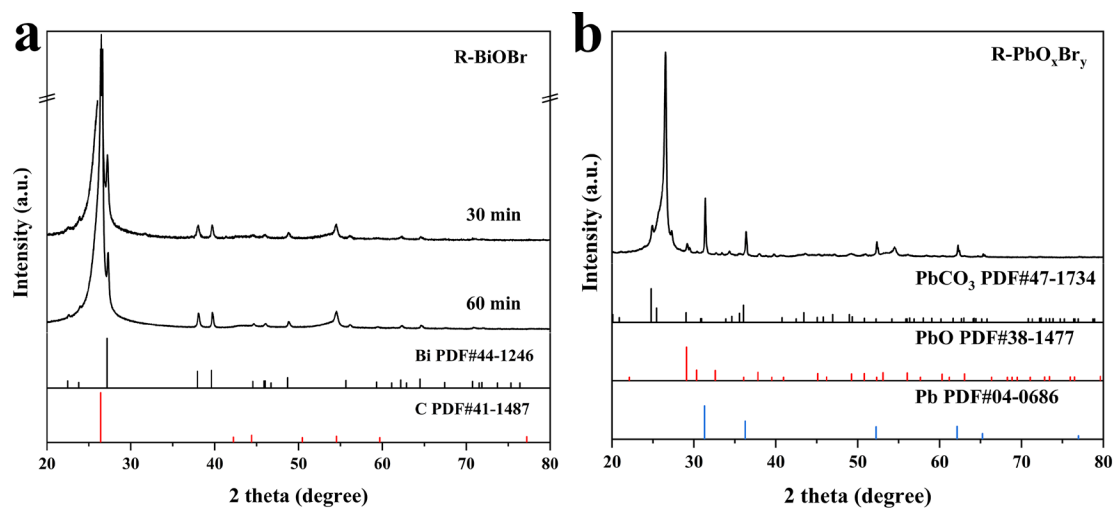

**Fig. S13.** XRD patterns of BiOBr and PbO<sub>x</sub>Br<sub>y</sub> after electroreduction.

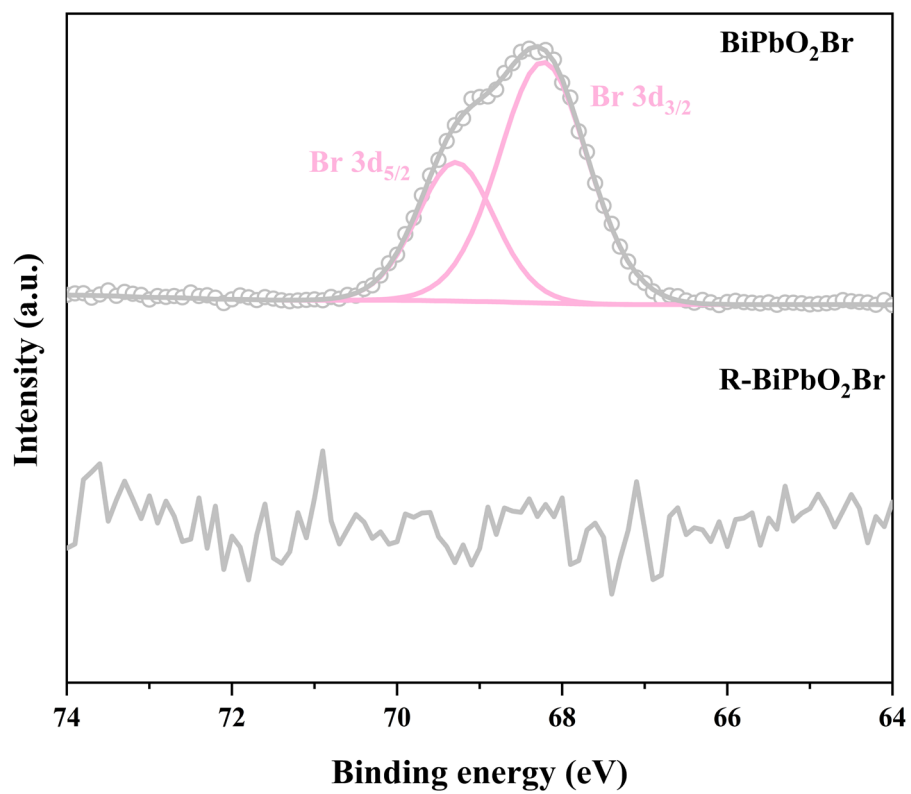

**Fig. S14.** Br 3d XPS spectra of BiPbO<sub>2</sub>Br before and after electroreduction.



## Reference

1. H. Zheng, G. Wu, G. Gao and X. Wang, The bismuth architecture assembled by nanotubes used as highly efficient electrocatalyst for CO<sub>2</sub> reduction to formate, *Chem. Eng. J.*, 2021, **421**, 129606.
2. S. Liu, Y. Fan, Y. Wang, S. Jin, M. Hou, W. Zeng, K. Li, T. Jiang, L. Qin, Z. Yan, Z. Tao, X. Zheng, C. Shen, Z. Liu, T. Ahmad, K. Zhang and W. Chen, Surface-Oxygen-Rich Bi@C Nanoparticles for High-Efficiency Electroreduction of CO<sub>2</sub> to Formate, *Nano Lett.*, 2022, **22**, 9107-9114.
3. Y. Zhou, P. Yan, J. Jia, S. Zhang, X. Zheng, L. Zhang, B. Zhang, J. Chen, W. Hao, G. Chen, Q. Xu and B. Han, Supercritical CO<sub>2</sub>-constructed intralayer [Bi<sub>2</sub>O<sub>2</sub>]<sup>2+</sup> structural distortion for enhanced CO<sub>2</sub> electroreduction, *J. Mater. Chem. A*, 2020, **8**, 13320-13327.
4. W. Huang, Y. Wang, J. Liu, Y. Wang, D. Liu, J. Dong, N. Jia, L. Yang, C. Liu, Z. Liu, B. Liu and Q. Yan, Efficient and Selective CO<sub>2</sub> Reduction to Formate on Pd-Doped Pb<sub>3</sub>(CO<sub>3</sub>)<sub>2</sub>(OH)<sub>2</sub>: Dynamic Catalyst Reconstruction and Accelerated CO<sub>2</sub> Protonation, *Small*, 2022, **18**, e2107885.
5. Y. C. He, D. D. Ma, S. H. Zhou, M. Zhang, J. J. Tian and Q. L. Zhu, Integrated 3D Open Network of Interconnected Bismuthene Arrays for Energy-Efficient and Electrosynthesis-Assisted Electrocatalytic CO<sub>2</sub> Reduction, *Small*, 2022, **18**, e2105246.
6. L. Peng, Y. Wang, Y. Wang, N. Xu, W. Lou, P. Liu, D. Cai, H. Huang and J. Qiao, Separated growth of Bi-Cu bimetallic electrocatalysts on defective copper foam for highly converting CO<sub>2</sub> to formate with alkaline anion-exchange membrane beyond KHCO<sub>3</sub> electrolyte, *Appl. Catal., B*, 2021, **288**, 120003.
7. Z. L. Yu, S. Q. Wu, L. W. Chen, Y. C. Hao, X. Su, Z. Zhu, W. Y. Gao, B. Wang and A. X. Yin, Promoting the Electrocatalytic Reduction of CO<sub>2</sub> on Ultrathin Porous Bismuth Nanosheets with Tunable Surface-Active Sites and Local pH Environments, *ACS Appl. Mater. Interfaces*, 2022, **14**, 10648-10655.
8. S. Q. Wu, Y. C. Hao, L. W. Chen, J. Li, Z. L. Yu, Z. Zhu, D. Liu, X. Su, L. Hu, H. Z. Huang and A. X. Yin, Modulating the electrocatalytic CO<sub>2</sub> reduction performances of bismuth nanoparticles with carbon substrates with controlled degrees of oxidation, *Nanoscale*, 2021, **13**, 20091-20097.
9. Y. Yuan, Q. Wang, Y. Qiao, X. Chen, Z. Yang, W. Lai, T. Chen, G. Zhang, H. Duan, M. Liu and H. Huang, In Situ Structural Reconstruction to Generate the Active Sites for CO<sub>2</sub> Electroreduction on Bismuth Ultrathin Nanosheets, *Adv. Energy Mater.*, 2022, **12**, 2200970.
10. P. Liu, H. Liu, S. Zhang, J. Wang and C. Wang, Effects of thicknesses and sizes of BiO<sub>x</sub> nanoplates precursors on derived Bi nanosheets for efficient CO<sub>2</sub> electroreduction, *J. CO<sub>2</sub> Util.*, 2021, **51**, 101643.
11. D. Wu, G. Huo, W. Chen, X.-Z. Fu and J.-L. Luo, Boosting formate production at high current density from CO<sub>2</sub> electroreduction on defect-rich hierarchical mesoporous Bi/Bi<sub>2</sub>O<sub>3</sub> junction nanosheets, *Appl. Catal., B*, 2020, **271**, 118957.
12. J. Zhu, J. Fan, T. Cheng, M. Cao, Z. Sun, R. Zhou, L. Huang, D. Wang, Y. Li and Y. Wu, Bilayer nanosheets of unusual stoichiometric bismuth oxychloride for potassium ion storage and CO<sub>2</sub> reduction, *Nano Energy*, 2020, **75**, 104939.
13. Z. Wu, H. Wu, W. Cai, Z. Wen, B. Jia, L. Wang, W. Jin and T. Ma, Engineering Bismuth-Tin Interface in Bimetallic Aerogel with a 3D Porous Structure for Highly Selective Electrocatalytic

- CO<sub>2</sub> Reduction to HCOOH, *Angew. Chem., Int. Ed.*, 2021, **60**, 12554-12559.
14. T. Tran-Phu, R. Daiyan, Z. Fusco, Z. Ma, R. Amal and A. Tricoli, Nanostructured  $\beta$ -Bi<sub>2</sub>O<sub>3</sub> Fractals on Carbon Fibers for Highly Selective CO<sub>2</sub> Electroreduction to Formate, *Adv. Funct. Mater.*, 2019, **30**, 1906478.
  15. X. Zhang, X. Jiao, Y. Mao, X. Zhu, H. Kang, Z. Song, X. Yan, X. Yan, C. Han, L. Cui, K. Zhang and J. Qiao, A BiPb bimetallic electrode for highly selective CO<sub>2</sub> conversion to formate, *Sep. Purif. Technol.*, 2022, **300**, 121848.
